# Supplementary material for: The effect of slope steepness and antecedent moisture content on interrill erosion, runoff and sediment size distribution in the highlands of Ethiopia
Source: Copernicus journal article supplement (doi:10.5194/hess-15-2367-2011), 2011-07-22

Figure 1 Erosion pan with 300 mm wide by 450 long test area and 200 mm buffer areas surrounding all sides

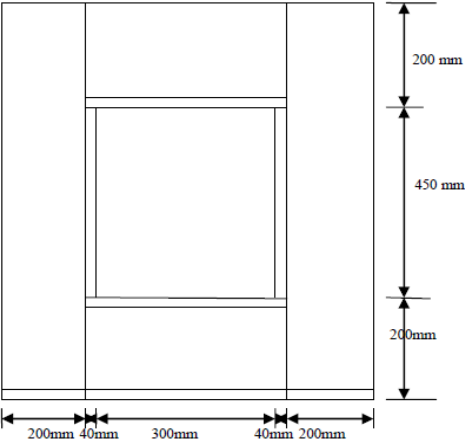

Figure 2. Data collection from the test area of the erosion pan

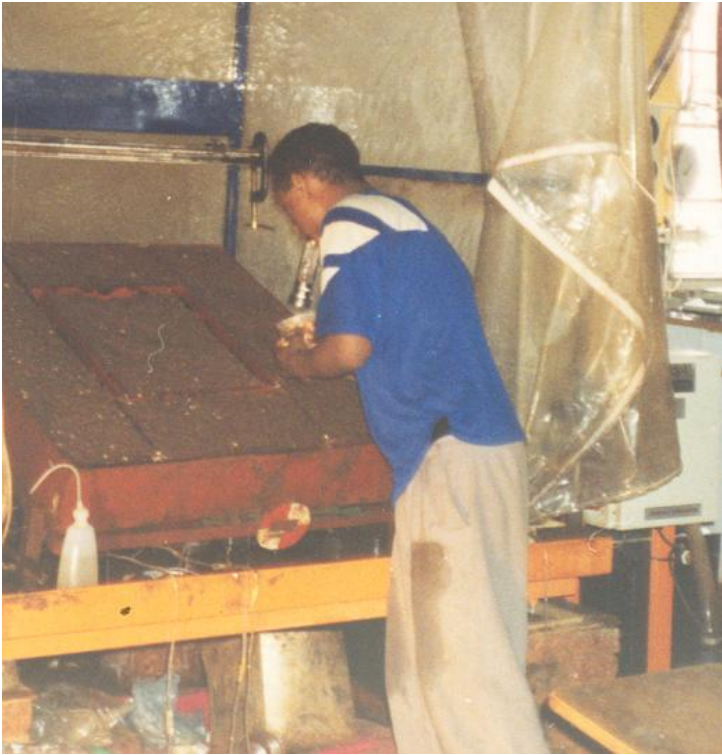

Figure 3. FEL 3 rainfall simulator and erosion pan

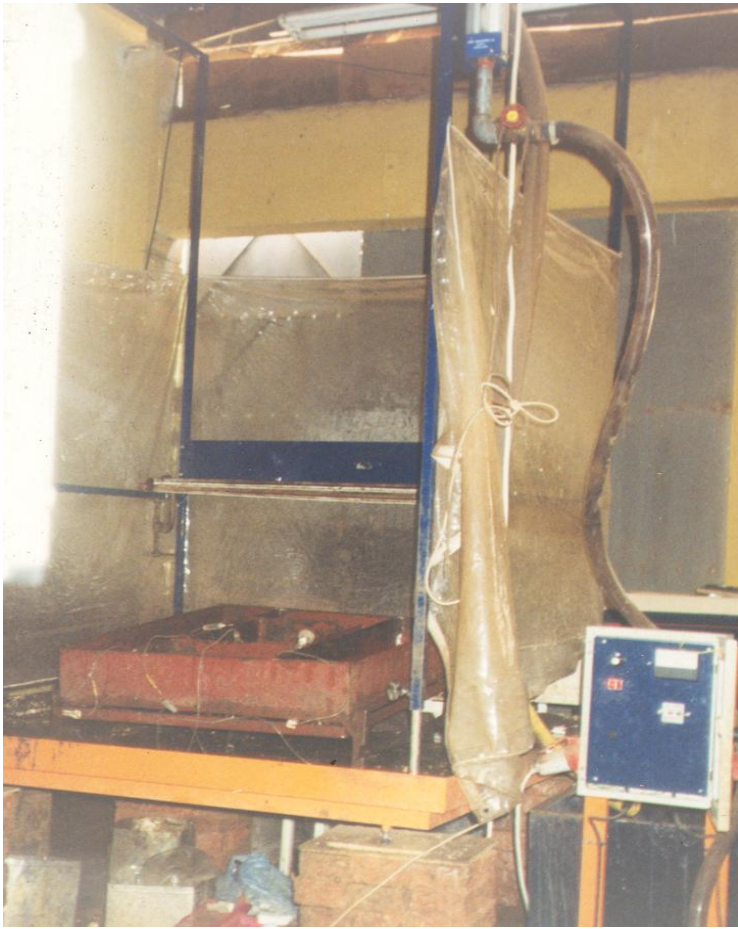

Table 1. The different combinations of pressure, disc speed, and aperture opening effect on the rate and uniformity of rainfall intensity.

| Discspeed(Rev min <sup>-1</sup> ) | Aperture size | Pressure Bar | Mean intensity | Coefficient of<br>uniformity |
|-----------------------------------|---------------|--------------|----------------|------------------------------|
| 20                                | 5             | 0.3          | 30.20          | 52.45                        |
| 20                                | 5             | 0.5          | 40.64          | 54.80                        |
| 30                                | 5             | 0.2          | 36.80          | 53.40                        |
| 30                                | 5             | 0.5          | 67.5           | 67.3                         |
| 40                                | 5             | 0.2          | 74.52          | 75.28                        |
| 40                                | 5             | 0.4          | 84.93          | 68.75                        |
| 40                                | 5             | 0.5          | 86.55          | 69.41                        |
| 50                                | 5             | 0.3          | 78.16          | 73.41                        |
| 50                                | 5             | 0.5          | 77.74          | 76.72                        |
| 60                                | 5             | 0.2          | 66.83          | 51.70                        |
| 60                                | 5             | 0.4          | 56.20          | 71.53                        |
| 60                                | 5             | 0.5          | 62.50          | 73.68                        |
| 60                                | 5             | 0.6          | 67.80          | 76.40                        |
| 70                                | 5             | 0.4          | 66.80          | 60.06                        |
| 70                                | 5             | 0.5          | 70.16          | 73.68                        |
| 60                                | 10            | 0.4          | 121.05         | 93.80                        |
| 60                                | 10            | 0.5          | 122.64         | 89.05                        |
| 60                                | 10            | 0.6          | 126.38         | 94.10                        |
| 70                                | 10            | 0.4          | 110.64         | 87.43                        |
| 70                                | 10            | 0.5          | 120.27         | 89.56                        |
| 60                                | 15            | 0.4          | 150.9          | 88.95                        |
| 60                                | 15            | 0.5          | 166.30         | 92.06                        |
| 70                                | 15            | 0.4          | 153.44         | 88.86                        |
| 70                                | 15            | 0.5          | 172.24         | 88.64                        |
| 60                                | 20            | 0.4          | 188.72         | 89.34                        |
| 60                                | 20            | 0.5          | 197.10         | 91.69                        |
| 70                                | 20            | 0.4          | 195.5          | 85.0                         |
| 70                                | 20            | 0.5          | 208.10         | 90.33                        |

Table 2. Correlation between erosion variables

| Variables                                                                                                            | Correlation | Probability |
|----------------------------------------------------------------------------------------------------------------------|-------------|-------------|
| Change in runoff rate Vs change in sediment yield                                                                    | 0.47        | 0.420       |
| (with increase in slope; among Soil A and antecedent moistures)<br>Change in runoff rate Vs change in sediment yield | 0.96        | 0.008       |
| Change in runoff rate Vs change in sediment yield                                                                    | 0.45        | 0.440       |
| Runoff rate Vs sediment yield                                                                                        | 0.66        | 0.003       |
| runoff rate Vs sediment yield                                                                                        | 0.40        | 0.096       |
| Change in runoff rate Vs change in sediment yield                                                                    | 0.83        | 0.001       |
| Change in splash Vs change in sediment yield                                                                         | 0.79        | 0.214       |
| Change in splash Vs change in sediment yield                                                                         | 0.36        | 0.419       |
| Change in splash Vs change in sediment yield                                                                         | 0.97        | 0.038       |
| Change in splash Vs change in sediment yield                                                                         | 0.426       | 0.077       |
| Splash Vs sediment yield                                                                                             | 0.399       | 0.110       |
| Splash Vs sediment yield                                                                                             | 0.71        | 0.009       |

Figure 4. Sediment yield (soil loss) at the three levels of slope steepness for 70mm/hr Rainfall intensity application

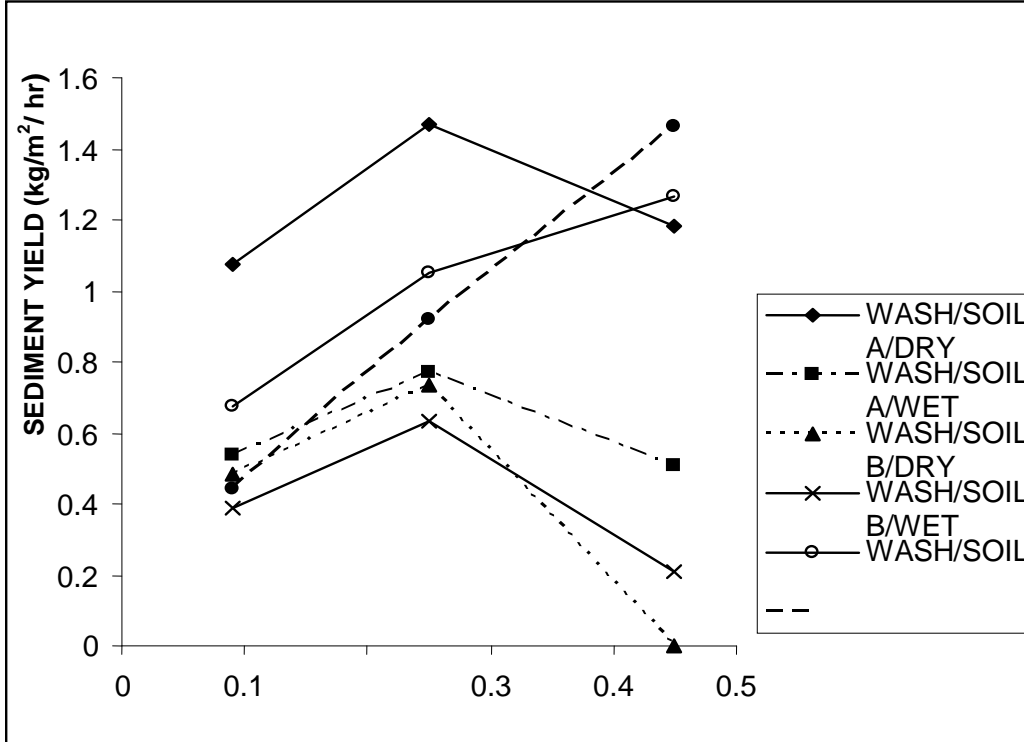

Figure 5. Sediment yield at the three levels of slope steepness for 120 mm/hr rainfall intensity application.

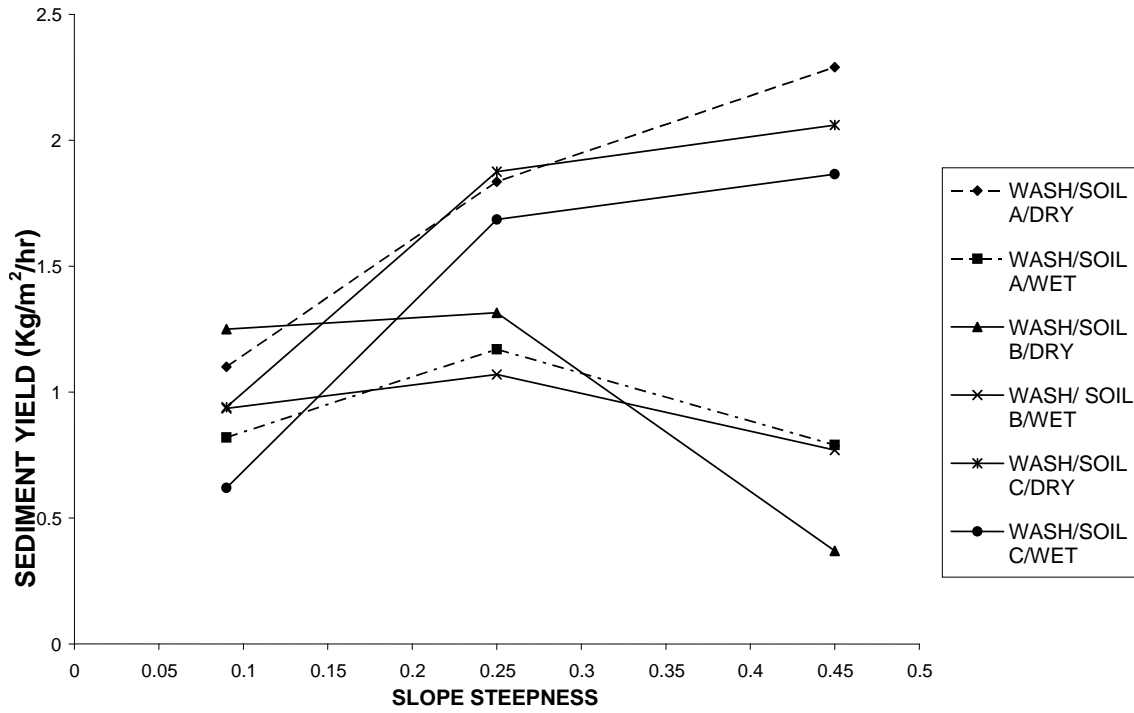

Figure 6. Sediment yield (soil loss) at the three levels of slope steepness for 55 mm/hr rainfall application

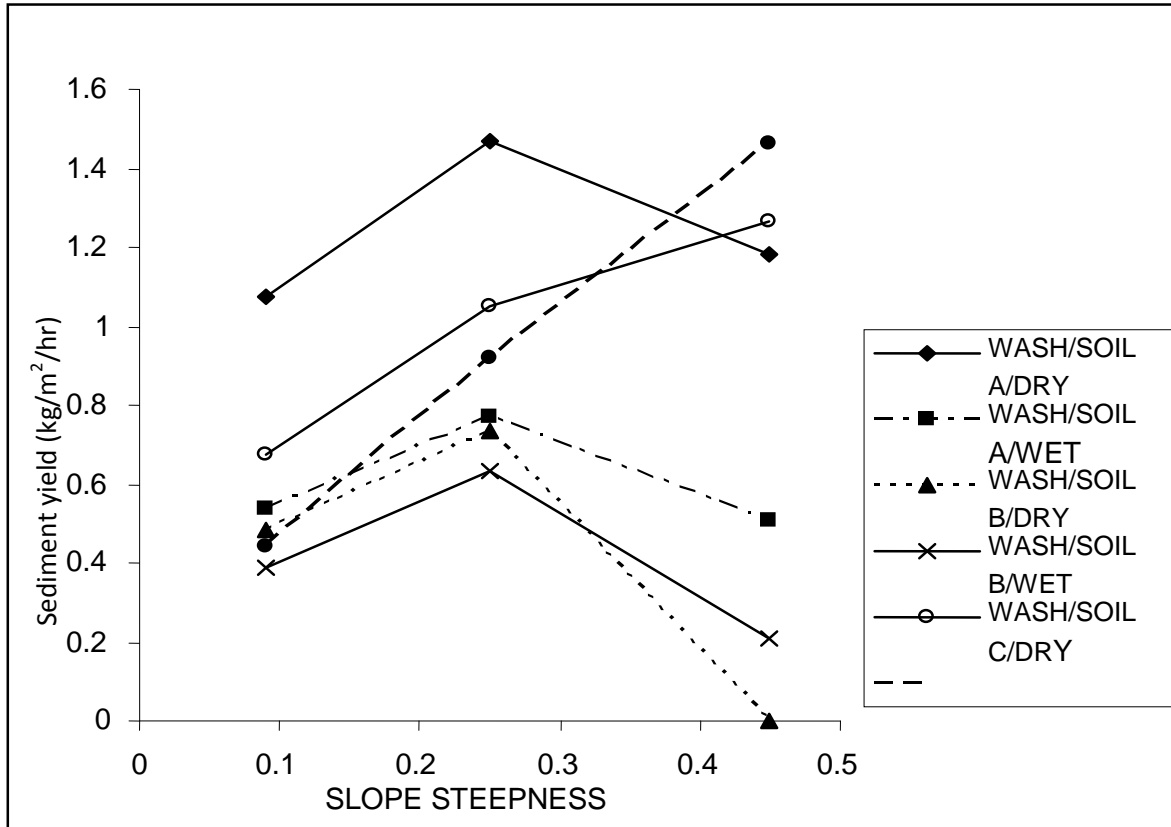

Supplement: Supplementary file 1 [file hess-15-2367-2011-supplement.pdf]
